# Supplementary material for: Surface Electrical Impedance Myography Detects Skeletal Muscle Atrophy in Aged Wildtype Zebrafish and Aged gpr27 Knockout Zebrafish
Source: MDPI journal article supplement (doi:10.3390/biomedicines11071938), 2023-07-07
Supplement: s1 [file s1]

## SUPPLEMENTARY MATERIAL

### Surface Electrical Impedance Myography Detects Skeletal Muscle Atrophy in Aged Wildtype Zebrafish and Aged *gpr27* Knockout Zebrafish

Seward B. Rutkove<sup>1,2,‡</sup>, Zsu-Zsu Chen<sup>3,4</sup>, Sarbesh Pandeya<sup>1</sup>, Santiago Callegari<sup>4</sup>, Tyler Mourey<sup>5</sup>, Janice A. Nagy<sup>1</sup>, and Anjali K. Nath<sup>2,4,6,‡</sup>

<sup>1</sup>Department of Neurology, Beth Israel Deaconess Medical Center, Boston, MA, 02215, USA.

<sup>2</sup>Harvard Medical School, Boston, MA 02215, USA.

<sup>3</sup>Department of Endocrinology, Beth Israel Deaconess Medical Center, Boston, MA 02215, USA.

<sup>4</sup>Department of Cardiology, Beth Israel Deaconess Medical Center, Boston, MA 02215, USA.

<sup>5</sup>Zebrafish Core Facility, Beth Israel Deaconess Medical Center, Boston, MA 02215, USA.

<sup>6</sup>Broad Institute, Cambridge, MA 02142, USA.

<sup>‡</sup>To whom correspondence should be addressed: Anjali K. Nath ([anath1@bidmc.harvard.edu](mailto:anath1@bidmc.harvard.edu)) and Seward B. Rutkove ([srutkove@bidmc.harvard.edu](mailto:srutkove@bidmc.harvard.edu))

## SUPPLEMENTARY FIGURES

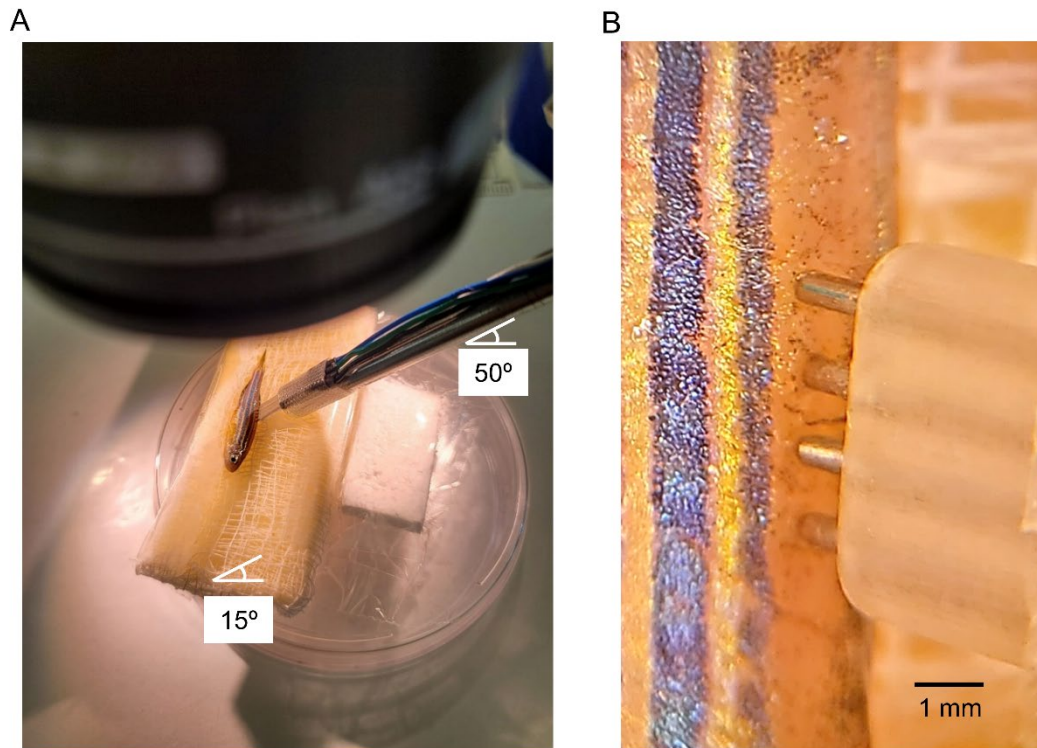

**Supplementary Figure S1. Micromanipulator-assisted electrode approach and electrode placement on caudal musculature of a zebrafish. A)** An anesthetized zebrafish was placed on a 15° angle wedge platform. The surface electrode was attached to a micromanipulator which was set at a 50° angle to the horizon. **B)** Zoomed-in image demonstrating the placement of the 4-pin surface electrode on the descaled epaxial caudal musculature. The electrode was positioned on the anterior-posterior axis and below the dorsal fin.

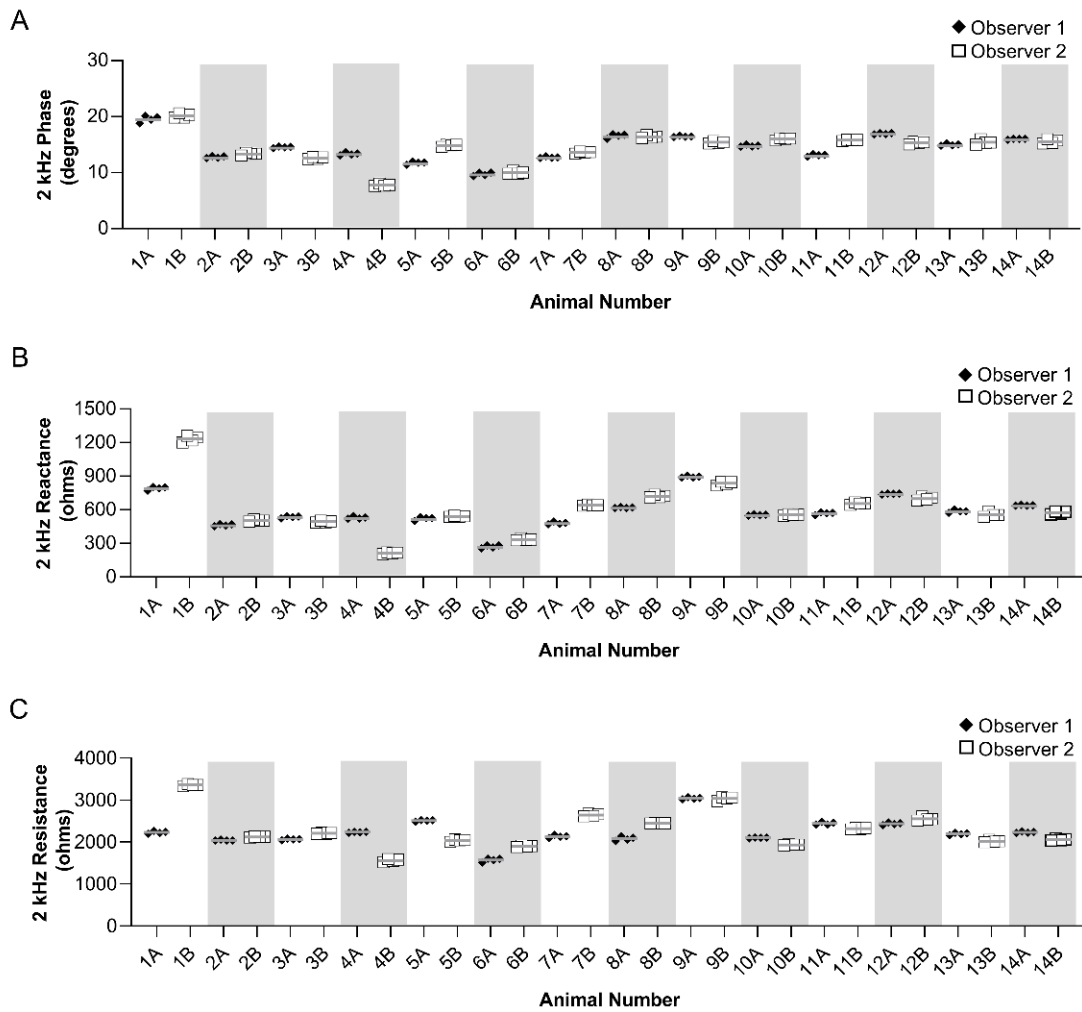

**Supplementary Figure S2. Surface electrical impedance myography measurements in zebrafish are reproducible between observers.** Values for impedance parameters: **A)** phase angle **B)** reactance, and **C)** resistance. Observer 1 (black diamonds) and Observer 2 (white squares) each independently acquired 4 serial readings on the same animal (the gray line denotes the mean value acquired by each Observer on each animal, n=14 young zebrafish, 8 months of age). The surface electrode was positioned on the animal by Observer 1 (black diamonds) and 4 serial measurements were captured. Next, the electrode was removed by Observer 1. Observer 2 (white squares) positioned the electrode and captured 4 additional serial measurements in the animal. Inter-observer reproducibility was further evaluated by calculating the mean percent difference between these repeated measures in the same animal conducted by two different observers; see Supplementary Table S1 below.

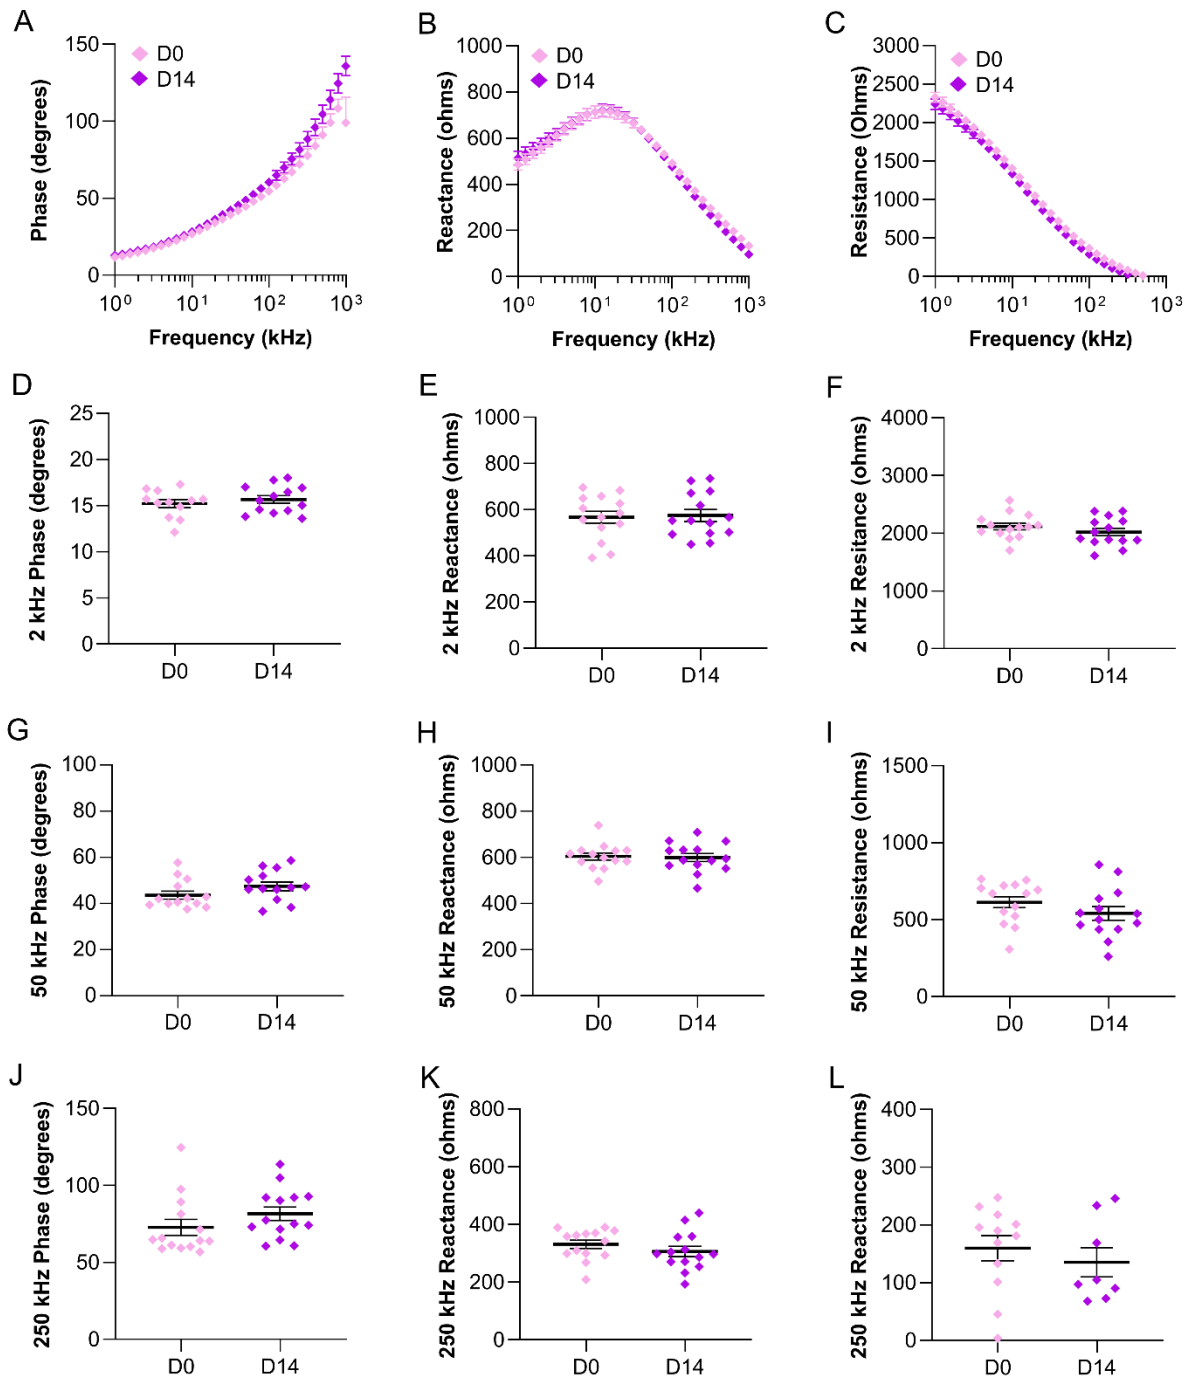

**Supplementary Figure S3. Surface electrical impedance myography conducted on different days exhibits temporal reproducibility.** To determine the temporal reproducibility of sEIM measurements in zebrafish skeletal muscle, data were acquired on different days (D0 and D14) in the same cohort of young animals (n=14). Multifrequency graphs (1 kHz – 1 MHz) for **A)** phase angle, **B)** reactance, and **C)** resistance. Single frequency analyses at **D)** 2 kHz phase, **E)** 2 kHz reactance, **F)** 2 kHz resistance, **G)** 50 kHz phase, **H)** 50 kHz reactance, **I)** 50 kHz resistance, **J)** 250 kHz phase, **K)** 250 kHz reactance, and **L)** 250 kHz resistance.

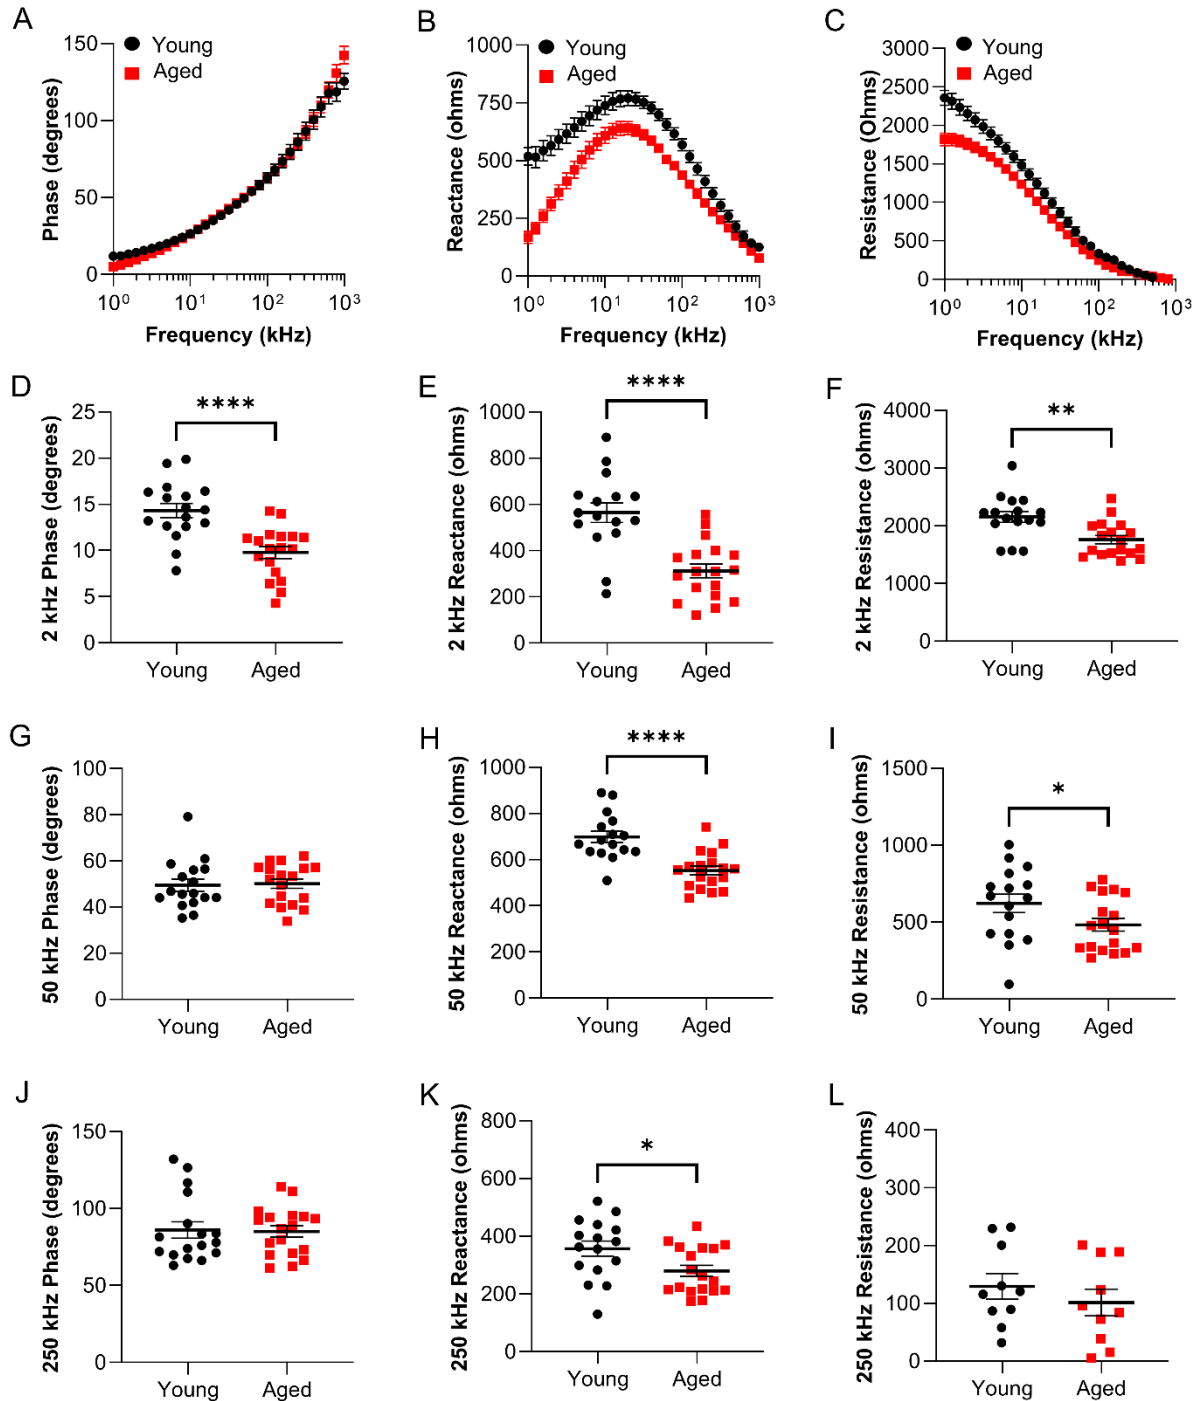

**Supplementary Figure S4. Surface electrical impedance myography detects age-related muscle changes in zebrafish.** In a replication cohort, sEIM parameters across a range of frequencies (1 kHz – 1 MHz) were measured in the epaxial caudal muscles of young (8 months) and aged zebrafish (36 months). Multifrequency graphs for **A)** phase, **B)** reactance, and **C)** resistance (n=17-20 animals per age group). Single frequency analyses at **D)** 2 kHz phase (p=0.000047, q=0.000091), **E)** 2 kHz reactance (p= 0.000044, q= 0.000091), **F)** 2 kHz resistance (p= 0.001553, q= 0.001631), **G)** 50 kHz phase, **H)** 50 kHz reactance (p=0.000065, q= 0.000091), **I)** 50 kHz resistance (p= 0.045282, q= 0.031697), **J)** 250 kHz phase, **K)** 250 kHz reactance (p= 0.015062, q=0.007908), **L)** 250 kHz resistance. \* p ≤ 0.05, \*\* p ≤ 0.01, \*\*\*\* p ≤ 0.0001.

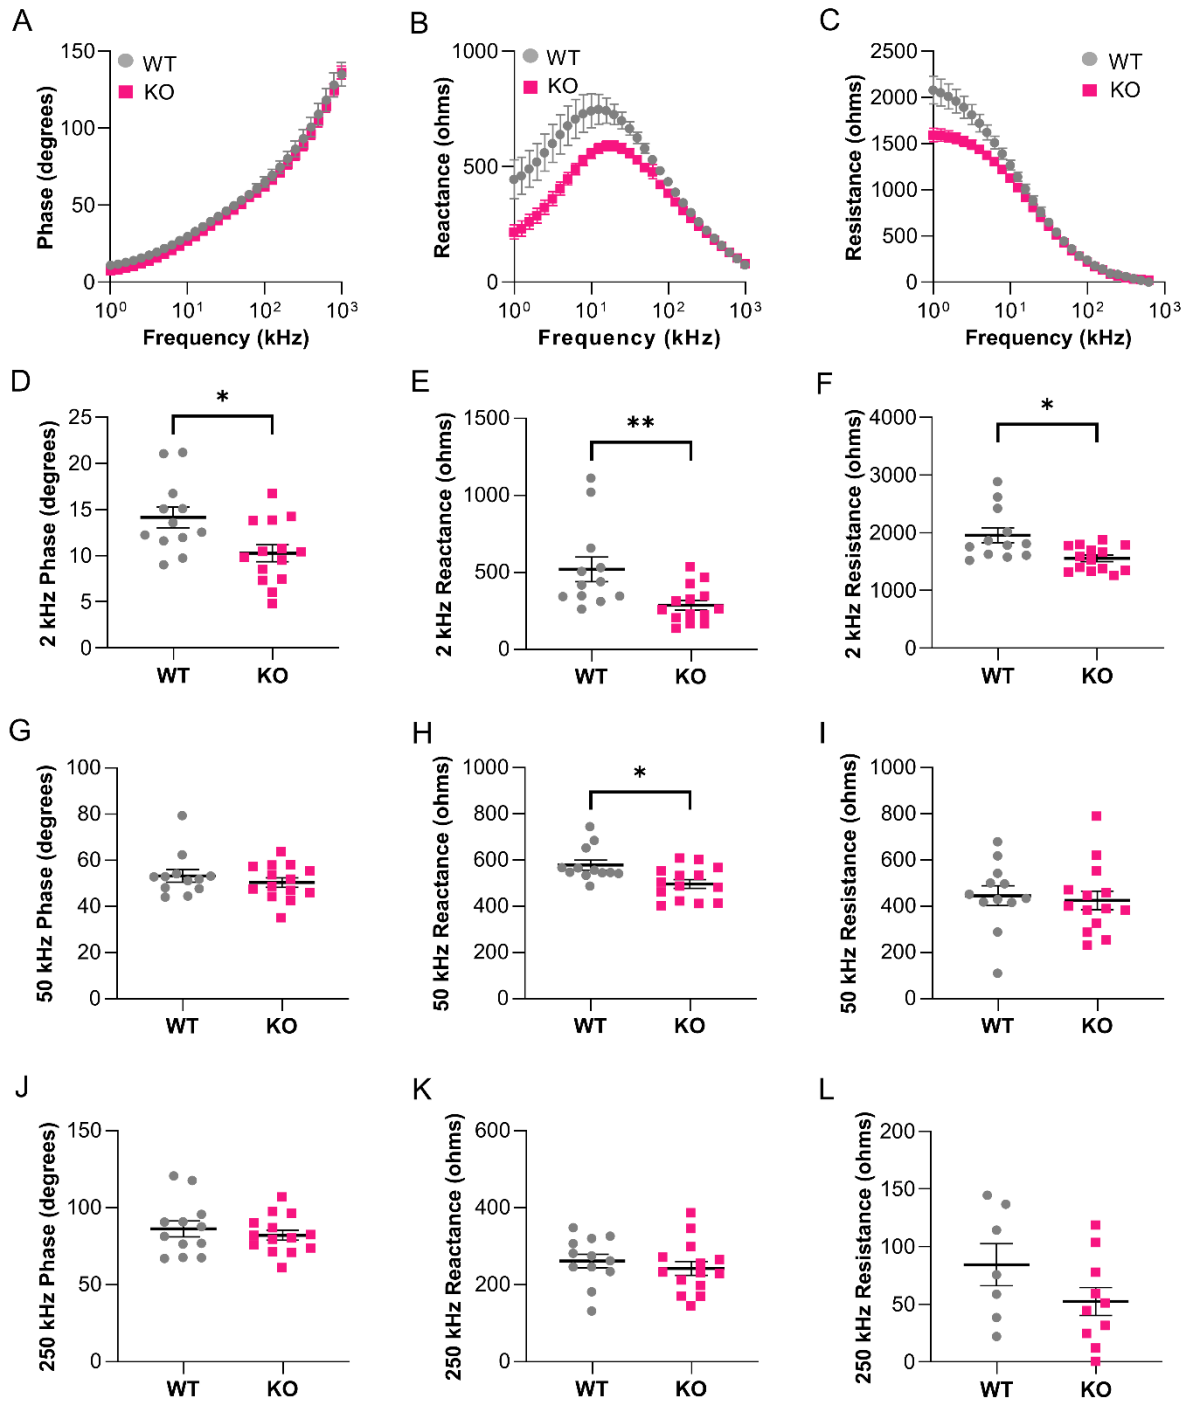

**Supplementary Figure S5. Surface electrical impedance myography detects skeletal muscle defects in young *gpr27* KOs.** sEIM parameters across a range of frequencies (1 kHz – 1 MHz) were measured in the epaxial caudal muscles of young *gpr27* KOs (12 months) and sibling WT (12 months). Multifrequency graphs for **A**) phase, **B**) reactance, and **C**) resistance (n=12-14). Single frequency analyses at **D**) 2 kHz phase (p=0.0233, q=0.0367), **E**) 2 kHz reactance (p=0.0004, q=0.0282), **F**) 2 kHz resistance (p=0.0126, q=0.0311), **G**) 50 kHz phase, **H**) 50 kHz reactance (p=0.0148, q=0.0311), **I**) 50 kHz resistance, **J**) 250 kHz phase, **K**) 250 kHz reactance, **L**) 250 kHz resistance. \* p ≤ 0.05, \*\* p ≤ 0.01.

**Supplementary Table S1. Inter-observer reproducibility of surface EIM in zebrafish.**

| Frequency (kHz) | Impedance Parameter <sup>a</sup> |             |              |
|-----------------|----------------------------------|-------------|--------------|
|                 | Phase                            | Reactance   | Resistance   |
| 2               | 6.76±3.57%                       | 9.80±5.94%  | 8.39±3.22%   |
| 50              | 6.71±3.50%                       | 12.29±4.20% | 12.65±10.75% |
| 250             | 4.35±5.52%                       | 21.9±7.27%  | 17.56±4.88%  |

kHz: kilohertz

<sup>a</sup> Reproducibility was assessed by calculating the median percent difference between Observer 1 and Observer 2, i.e. the electrode was retracted and repositioned between Observers. See Supplementary Figure 2.
